# Supplementary material
Source: PubMed Central journal article supplement (PMC1383508)
Supplement: 7600922s3.pdf [file 7600922s3.pdf]

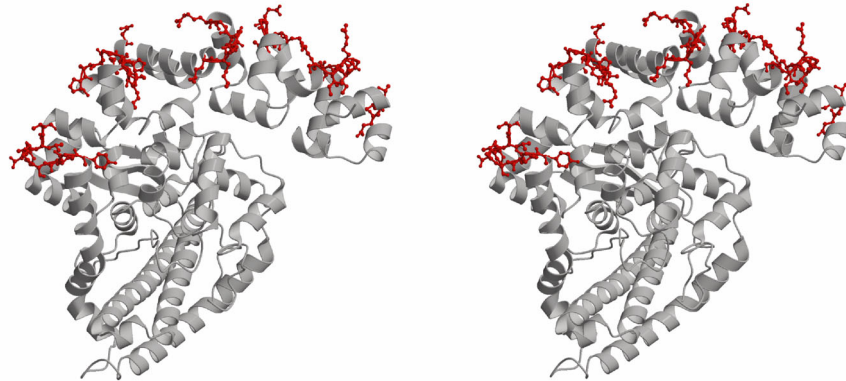

**Supplementary Figure 2.** Stereo diagram of the topoisomerase V structure with the hairpin loops in the multiHhH domain highlighted. The hairpin loops, which are the regions that interact with DNA in an HhH motif, are shown in red, while the rest of the structure is shown in grey. The diagram shows that the putative DNA binding regions in the multiHhH domain face away from the topoisomerase domain. Additionally, it is clear that the four (HhH)<sub>2</sub> domains could not bind the same DNA molecule without a large conformational change in the protein, the DNA, or both. A straight DNA molecule could not be simultaneously bound to all four motifs. This observation suggests that the protein and the DNA are likely to be highly distorted when bound together.
